# Supplementary figures and images for: Human septins organize as octamer-based filaments and mediate actin-membrane anchoring in cells
Source: PubMed Central journal article supplement — J Cell Biol. 2022 Dec 23;222(3):e202203016. doi: 10.1083/jcb.202203016 (PMC9802686; doi:10.1083/jcb.202203016), 2022-12-23

**E**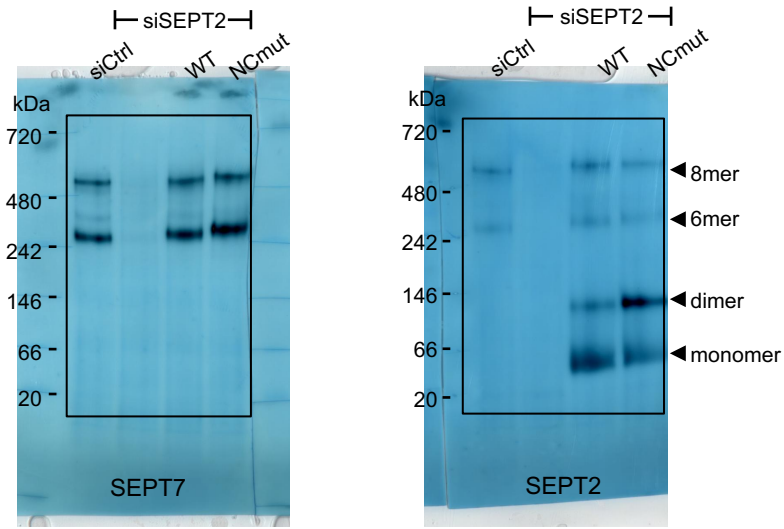

Supplement: JCB_202203016_SourceDataF2.pdf [file JCB_202203016_SourceDataF2.pdf]

**A**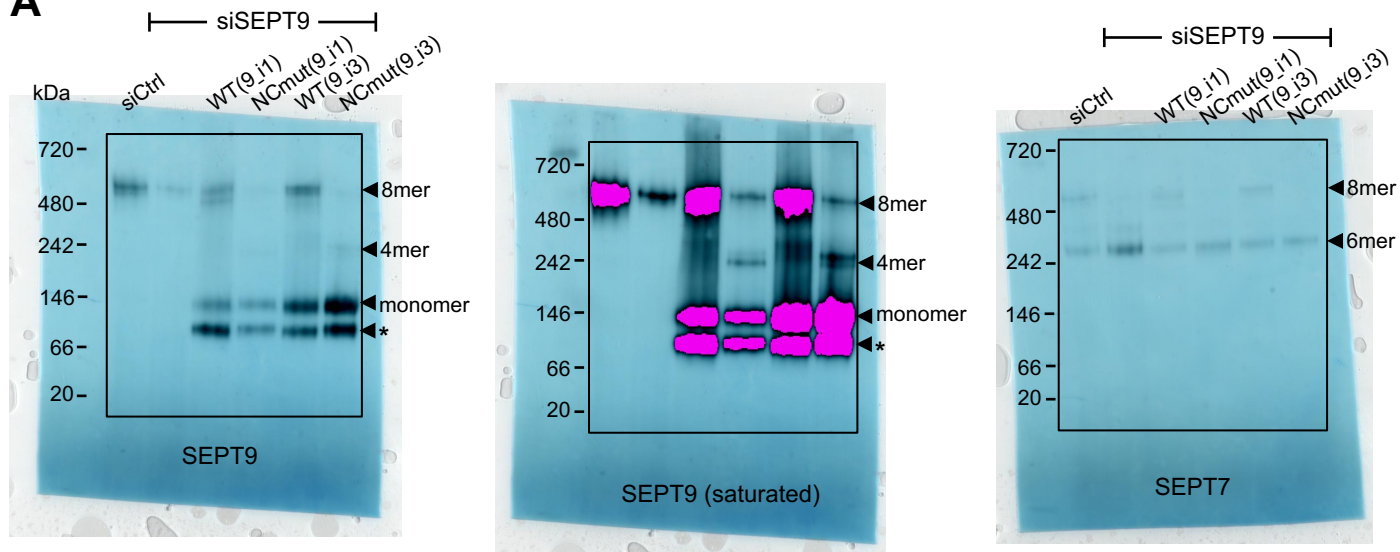**B**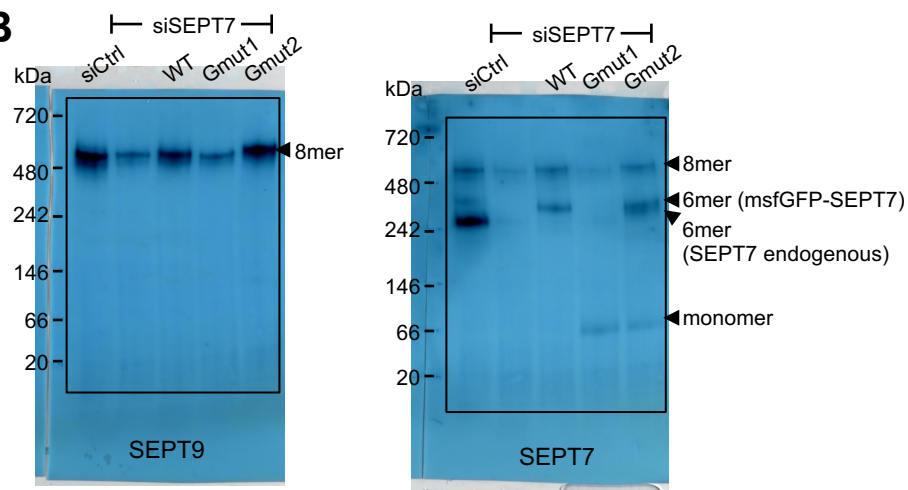

Supplement: JCB_202203016_SourceDataF4.pdf [file JCB_202203016_SourceDataF4.pdf]

**D**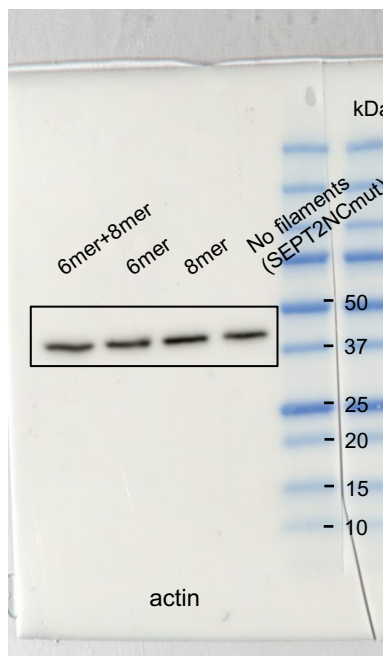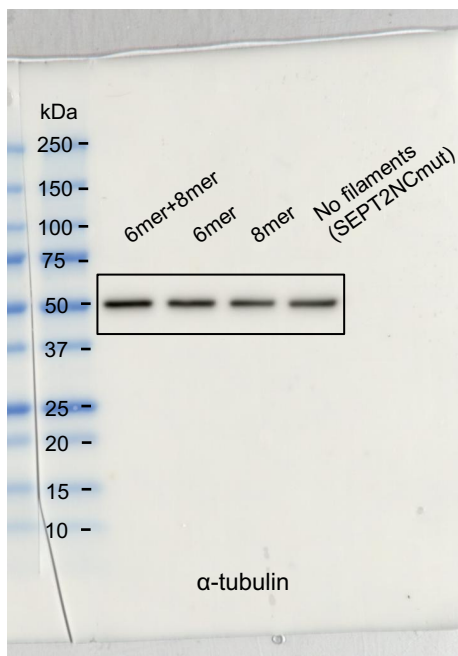

Supplement: JCB_202203016_SourceDataF8.pdf [file JCB_202203016_SourceDataF8.pdf]

**E**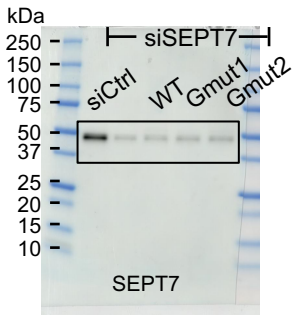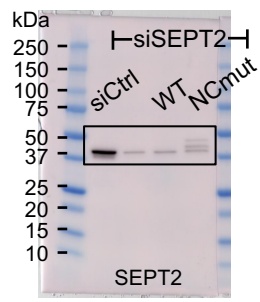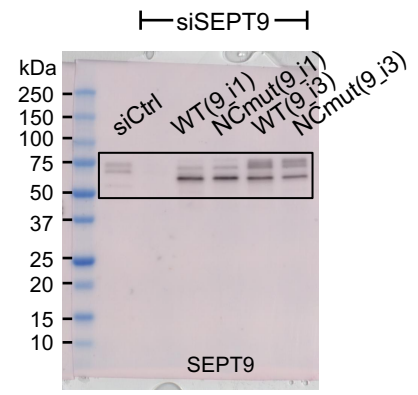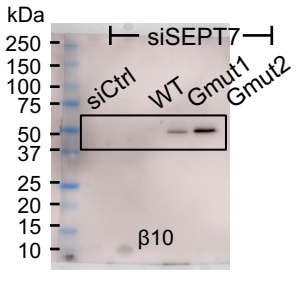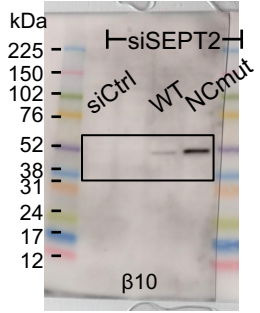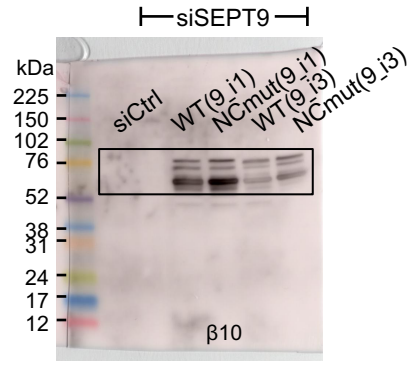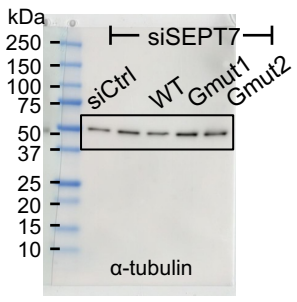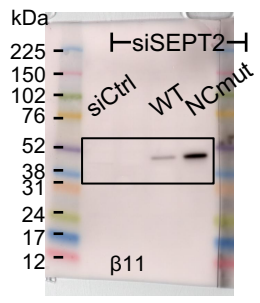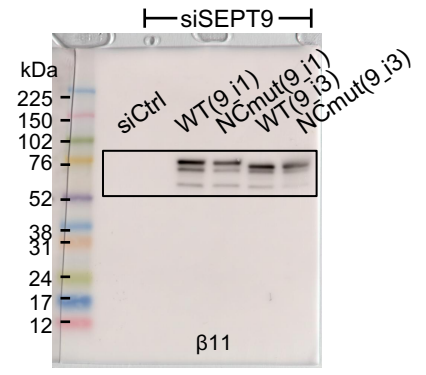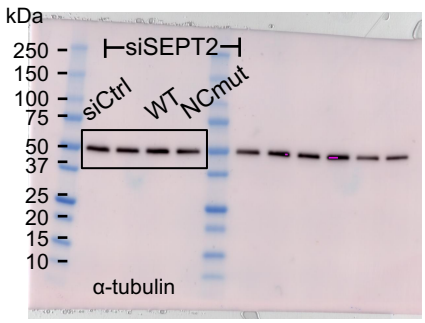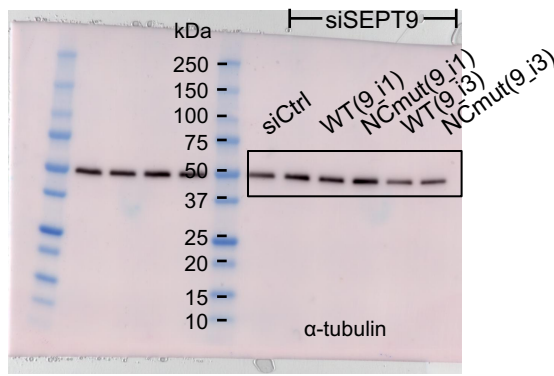

**F**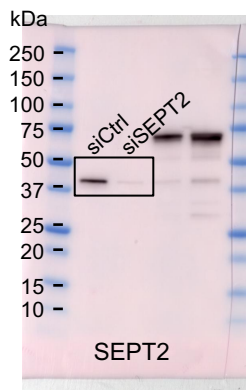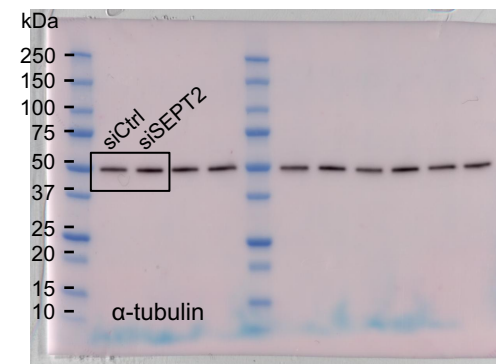**G**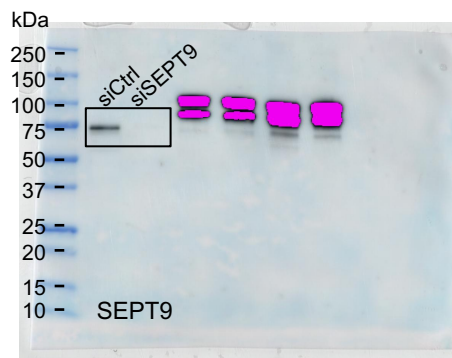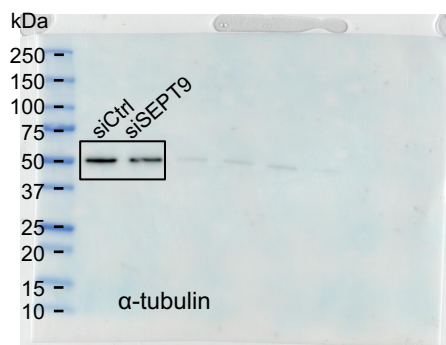**H**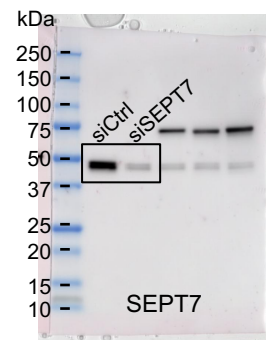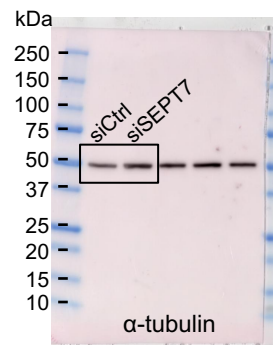

Supplement: JCB_202203016_SourceDataFS2.pdf [file JCB_202203016_SourceDataFS2.pdf]

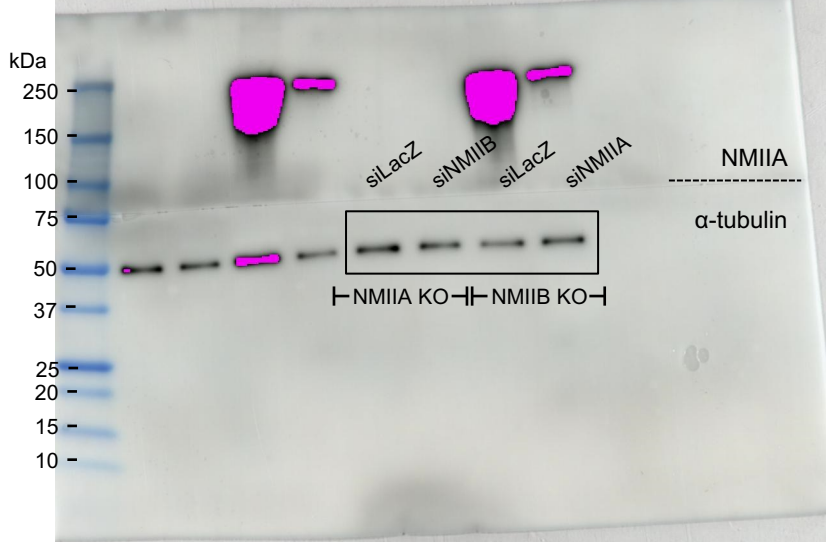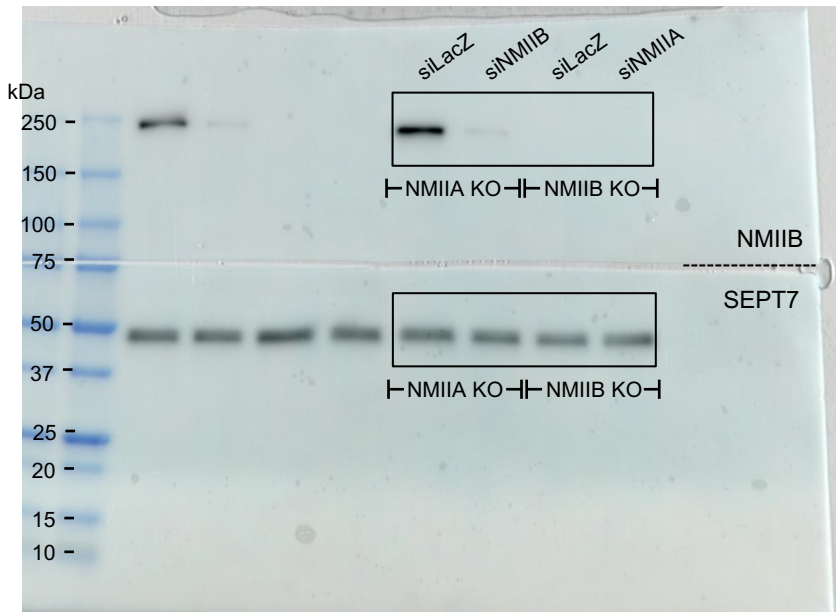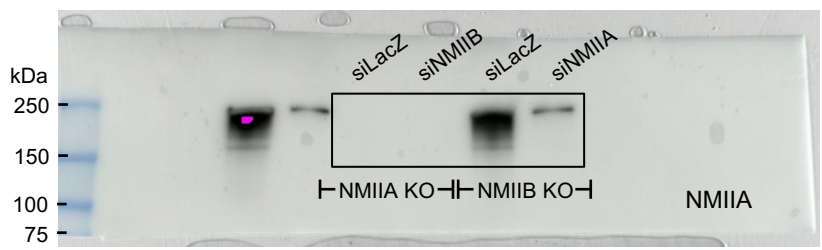

Supplement: JCB_202203016_SourceDataFS5.pdf [file JCB_202203016_SourceDataFS5.pdf]
